# Supplementary material for: Four-year bacterial monitoring in the International Space Station—Japanese Experiment Module “Kibo” with culture-independent approach
Source: PubMed Central journal article supplement — NPJ Microgravity. 2016 Apr 21;2:16007–. doi: 10.1038/npjmgrav.2016.7 (PMC5515537; doi:10.1038/npjmgrav.2016.7), 2016-04-21
Supplement: npjmgrav20167-s1.pdf [file npjmgrav20167-s1.pdf]

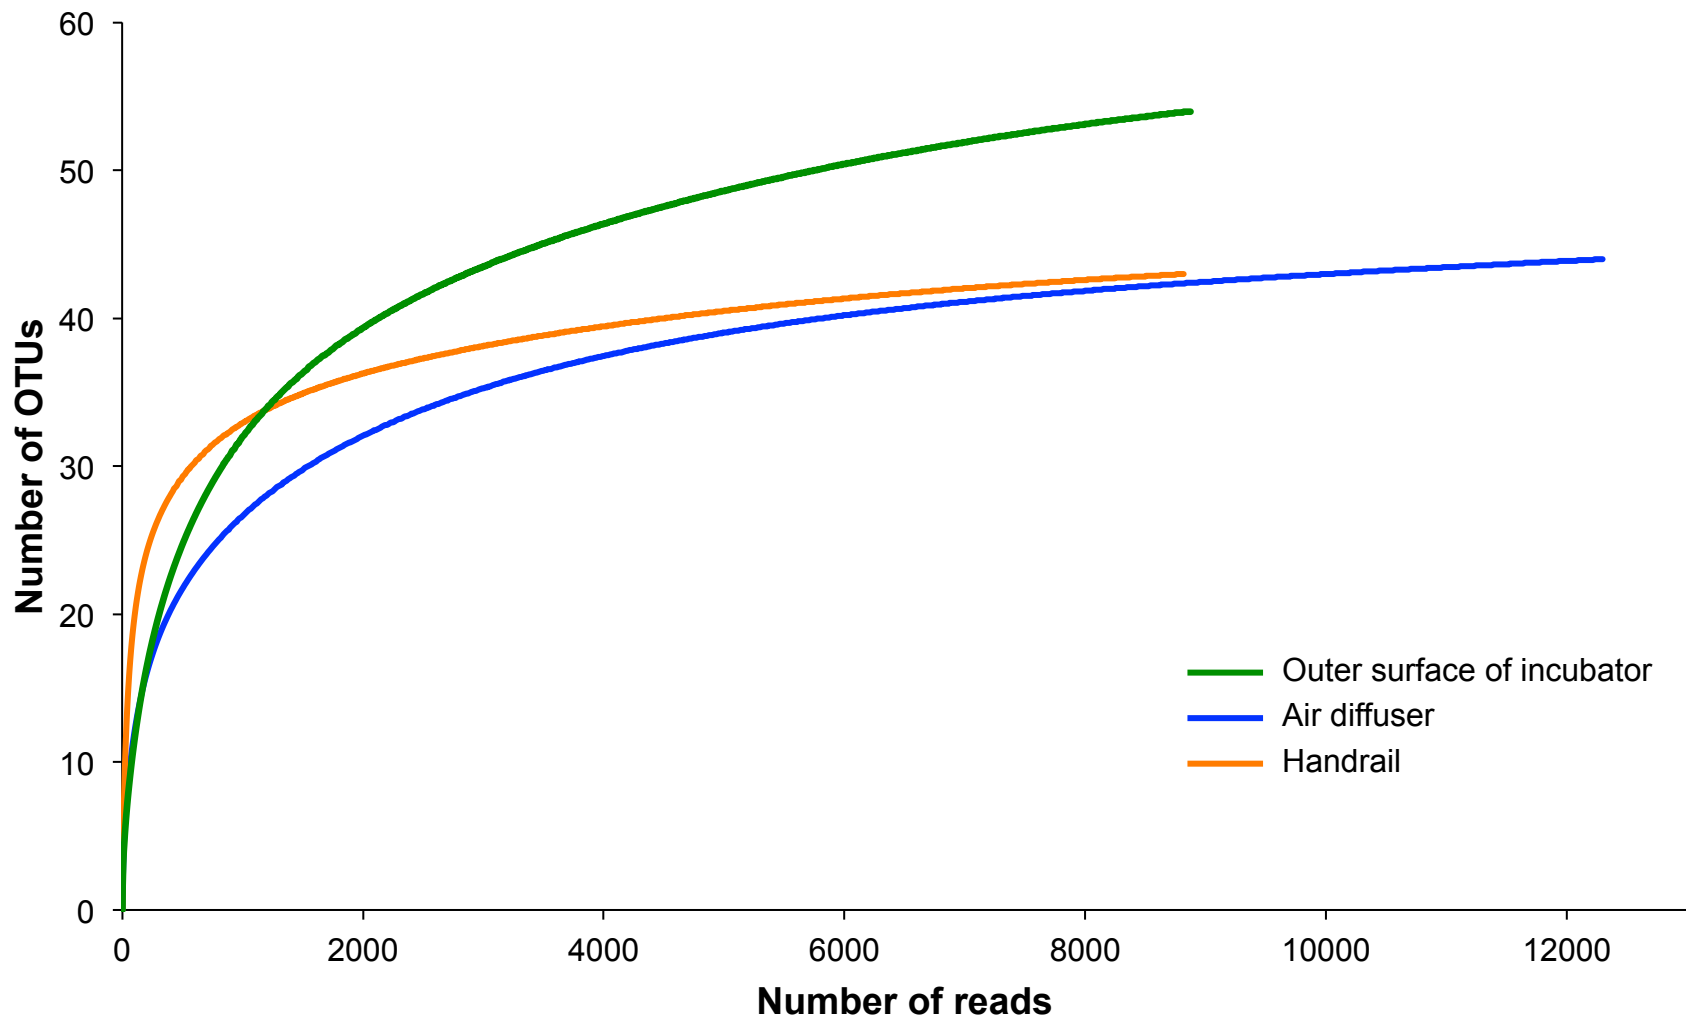

**Figure S1(A): Rarefaction curves of family richness in Microbe-I samples**

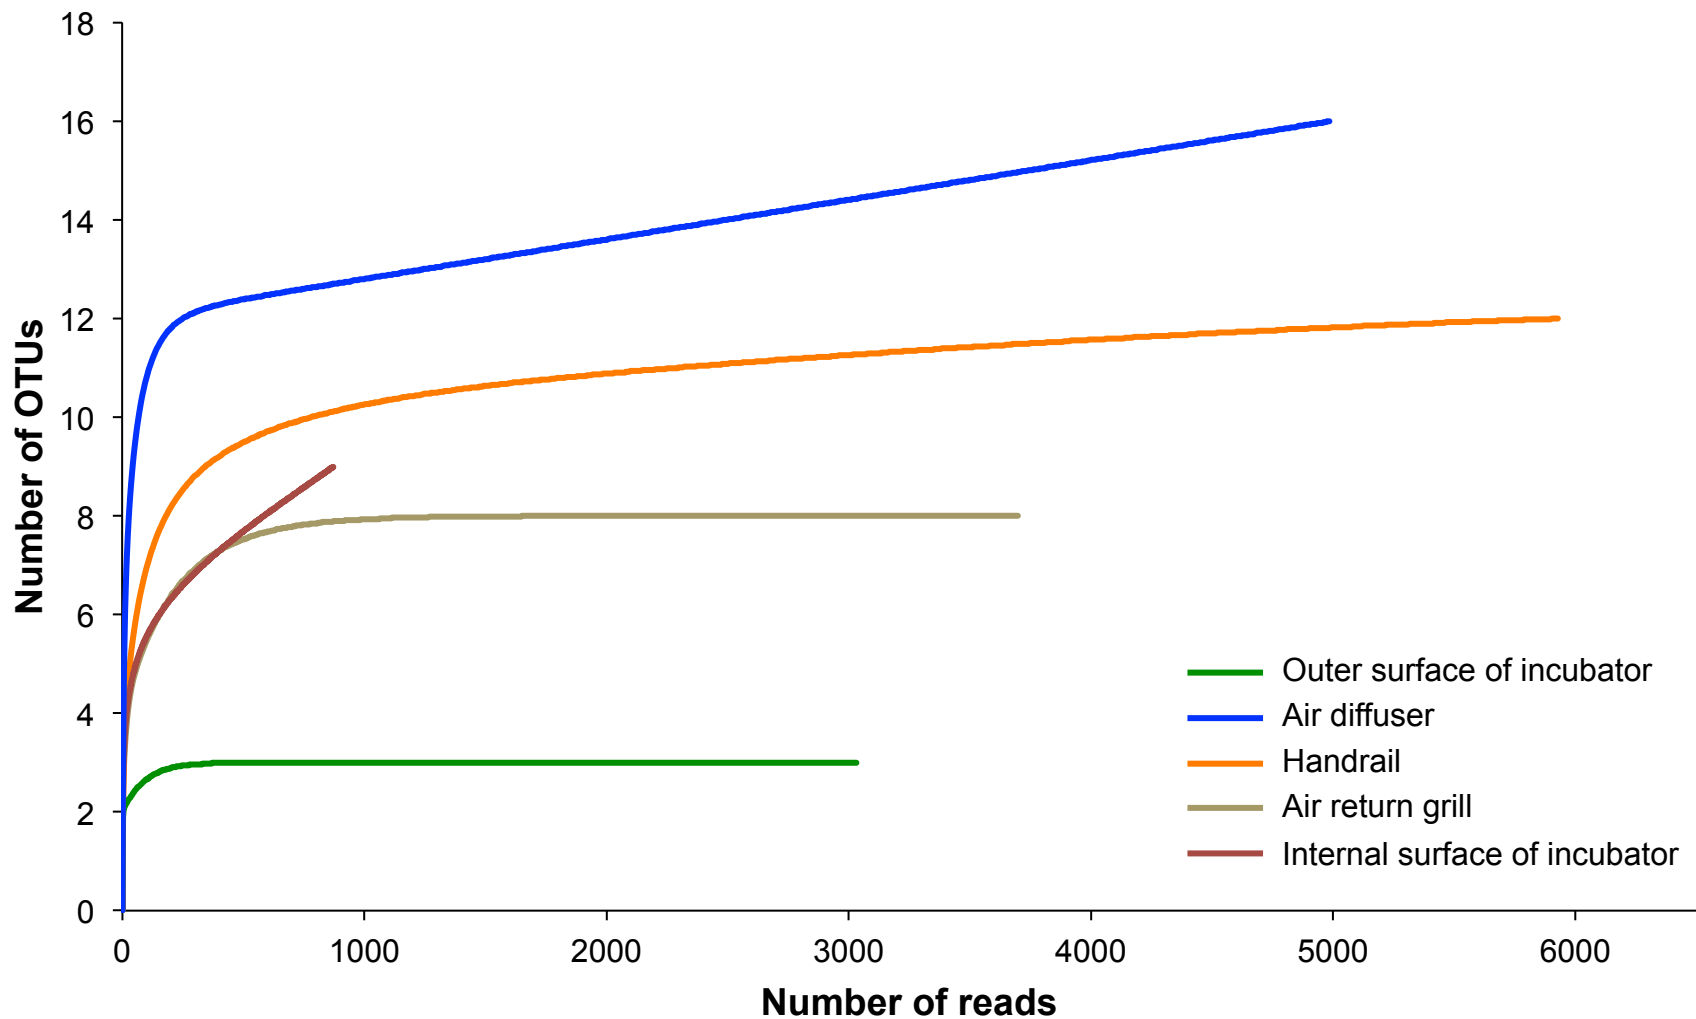

**Figure S1(B): Rarefaction curves of family richness in Microbe-II samples**

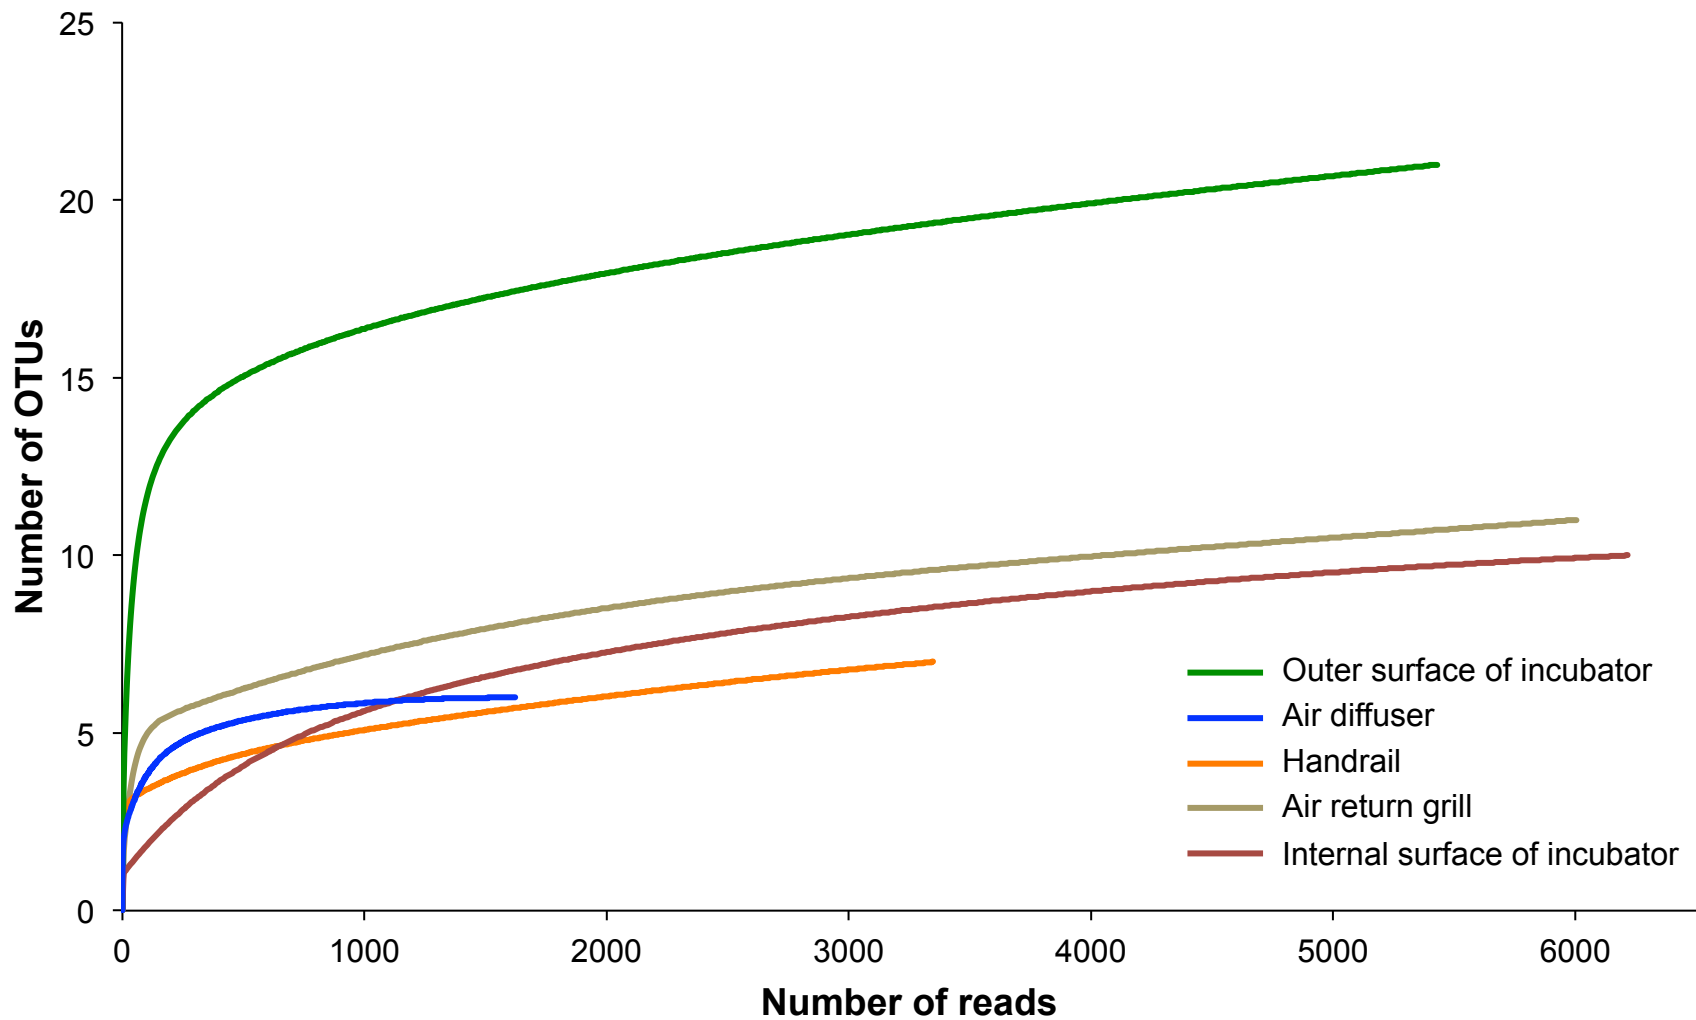

**Figure S1(C): Rarefaction curves of family richness in Microbe-III samples**
