# Supplementary material for: Four-year bacterial monitoring in the International Space Station—Japanese Experiment Module “Kibo” with culture-independent approach
Source: PubMed Central journal article supplement — NPJ Microgravity. 2016 Apr 21;2:16007–. doi: 10.1038/npjmgrav.2016.7 (PMC5515537; doi:10.1038/npjmgrav.2016.7), 2016-04-21
Supplement: npjmgrav20167-s2.pdf [file npjmgrav20167-s2.pdf]

**Table S1. Observed OTUs**

| Phase       | Sampling point                | Observed OTUs | Chao1 index | Coverage (%) <sup>a</sup> |
|-------------|-------------------------------|---------------|-------------|---------------------------|
| Microbe-I   | Outer surface of incubator    | 54            | 57.1        | 95                        |
|             | Air diffuser                  | 44            | 49          | 90                        |
|             | Handrail                      | 43            | 44.5        | 97                        |
| Microbe-II  | Outer surface of incubator    | 3             | 3           | 100                       |
|             | Air diffuser                  | 16            | 22          | 73                        |
|             | Handrail                      | 12            | 12          | 100                       |
|             | Air return grill              | 8             | 8           | 100                       |
|             | Internal surface of incubator | 9             | 12          | 75                        |
| Microbe-III | Outer surface of incubator    | 21            | 27          | 78                        |
|             | Air diffuser                  | 6             | 6           | 100                       |
|             | Handrail                      | 7             | 7.5         | 93                        |
|             | Air return grill              | 11            | 14          | 79                        |
|             | Internal surface of incubator | 10            | 10.3        | 97                        |

<sup>a</sup> Coverage (%) = Observed OTUs / Chao1 index
